# Supplementary material for: Ruthenium single atoms implanted on NiS2-FeS2 nanosheet heterostructures for efficacious water electrolysis
Source: Royal Society of Chemistry journal article supplement (doi:10.1039/d3ta05630a), 2024-01-01
Supplement: d3ta05630a1.pdf [file d3ta05630a1.pdf]

**Electronic Supplementary Information (ESI†)**

**Ruthenium single atoms implanted on NiS<sub>2</sub>-FeS<sub>2</sub> nanosheet heterostructures for  
efficacious water electrolysis**

Ram Babu Ghising<sup>a</sup>, Uday Narayan Pan<sup>a</sup>, Mani Ram Kandel<sup>a</sup>, Purna Prasad Dhakal<sup>a</sup>, Saleem Sidra<sup>b</sup>, Do Hwan Kim<sup>b</sup>, Nam Hoon Kim<sup>a\*</sup>, Joong Hee Lee<sup>a,c\*</sup>

<sup>a</sup>Department of Nano Convergence Engineering (BK21 four), Jeonbuk National University, Jeonju, Jeonbuk, 54896, Republic of Korea

<sup>b</sup>Division of Science Education, Graduate School, Department of Energy Storage/Conversion Engineering, Jeonbuk National University, Jeonju, Jeonbuk, 54896, Republic of Korea

<sup>c</sup>Carbon Composite Research Center, Jeonbuk National University, Jeonju, Jeonbuk, 54896, Republic of Korea.

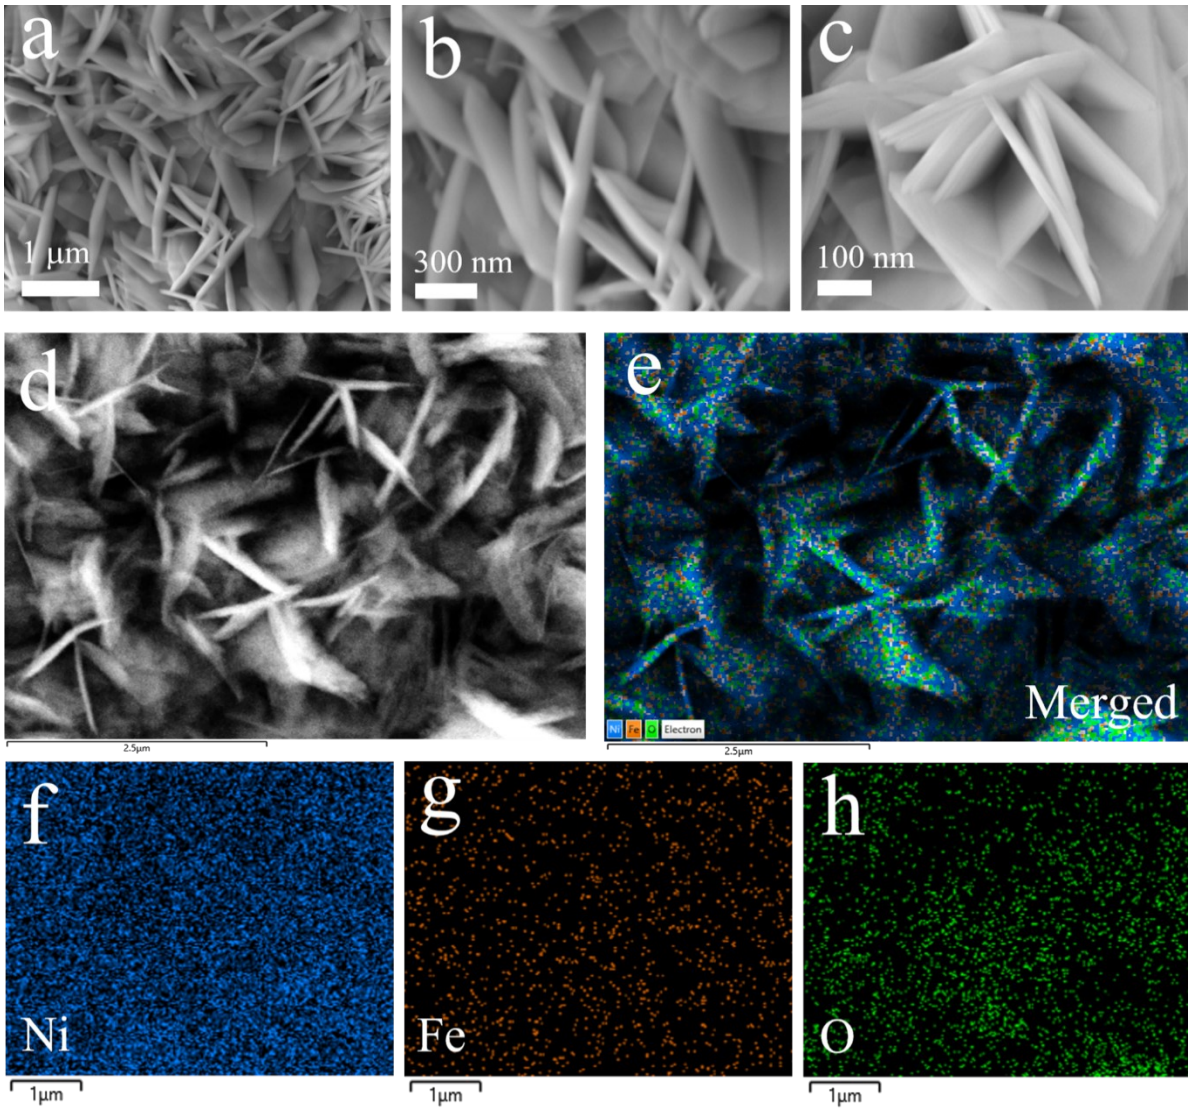

**Fig. S1:** (a-c) FE-SEM images of NiFe-LDH from low to high magnifications. (d) FE-SEM electronic image, (e) EDS layered image, and (f-h) SEM-EDS color mappings of individual elements Ni, Fe, and O of NiFe-LDH.

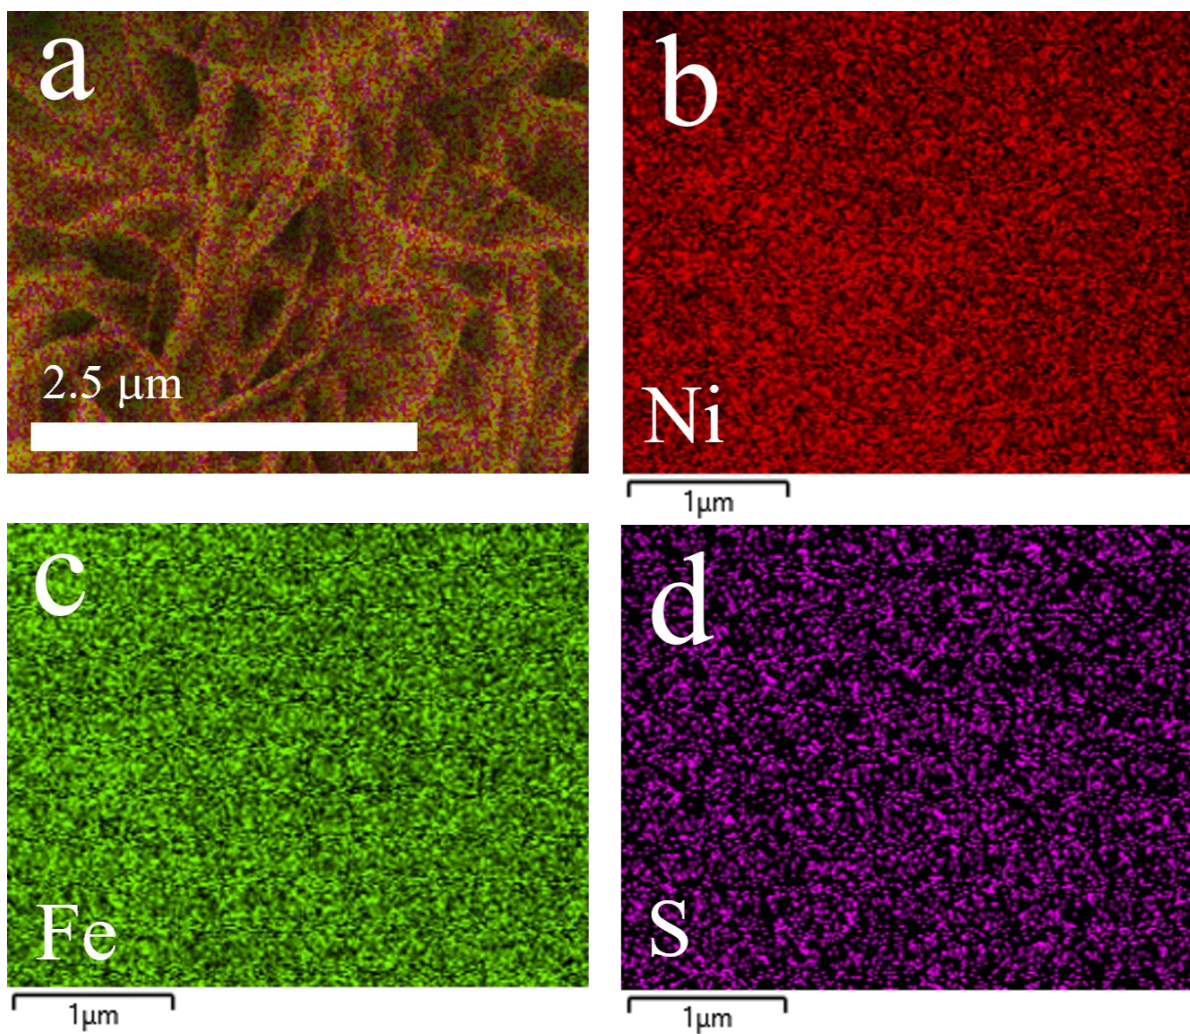

**Fig. S2:** (a) Merged color mappings, and (b-d) FE-SEM EDS color mappings of individual elements like Ni, Fe and S of  $\text{NiS}_2\text{-FeS}_2$ .

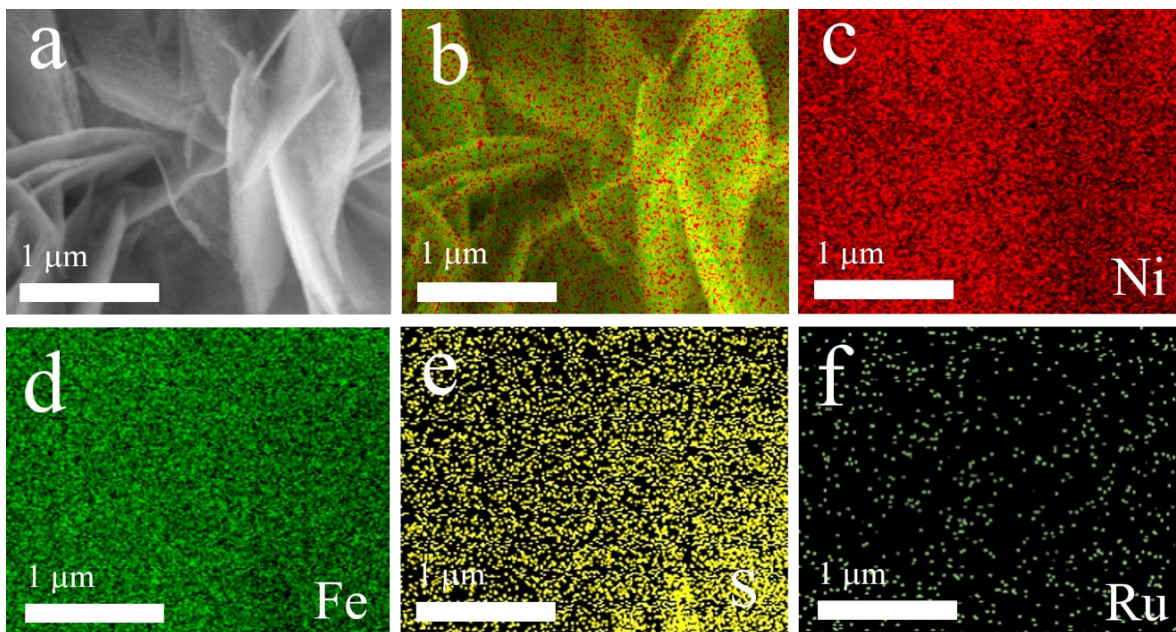

**Fig. S3:** FE-SEM and EDS images of  $\text{Ru}_{\text{SA}}\text{-NiS}_2\text{-FeS}_2$ : (a) Electronic image, (b) EDS layered image, (c-f) Individual color mappings of Ni, Fe, S and Ru of  $\text{Ru}_{\text{SA}}\text{-NiS}_2\text{-FeS}_2$ .

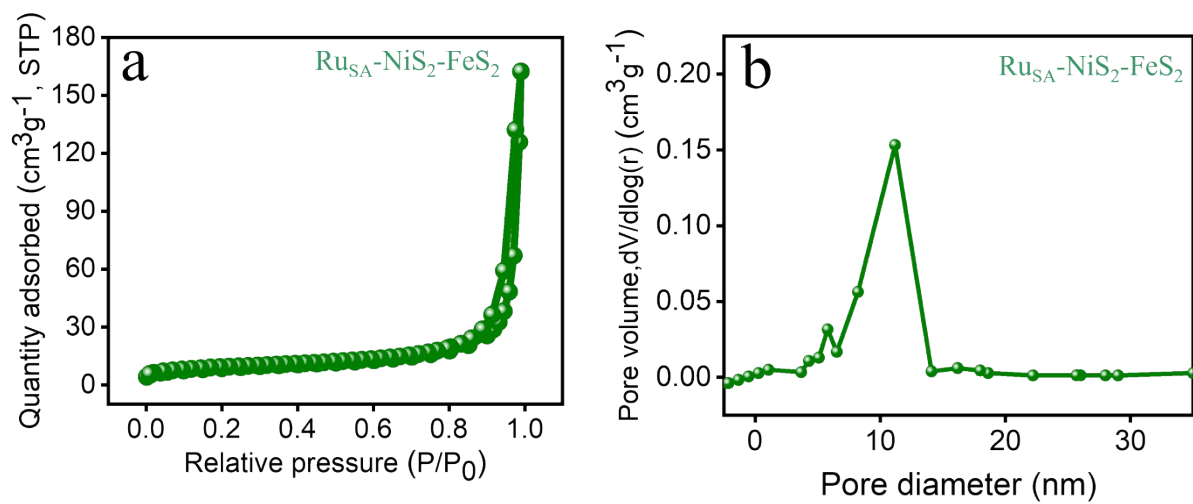

**Fig. S4:** Specific surface area and pore size distribution of  $\text{Ru}_{\text{SA}}\text{-NiS}_2\text{-FeS}_2$ .

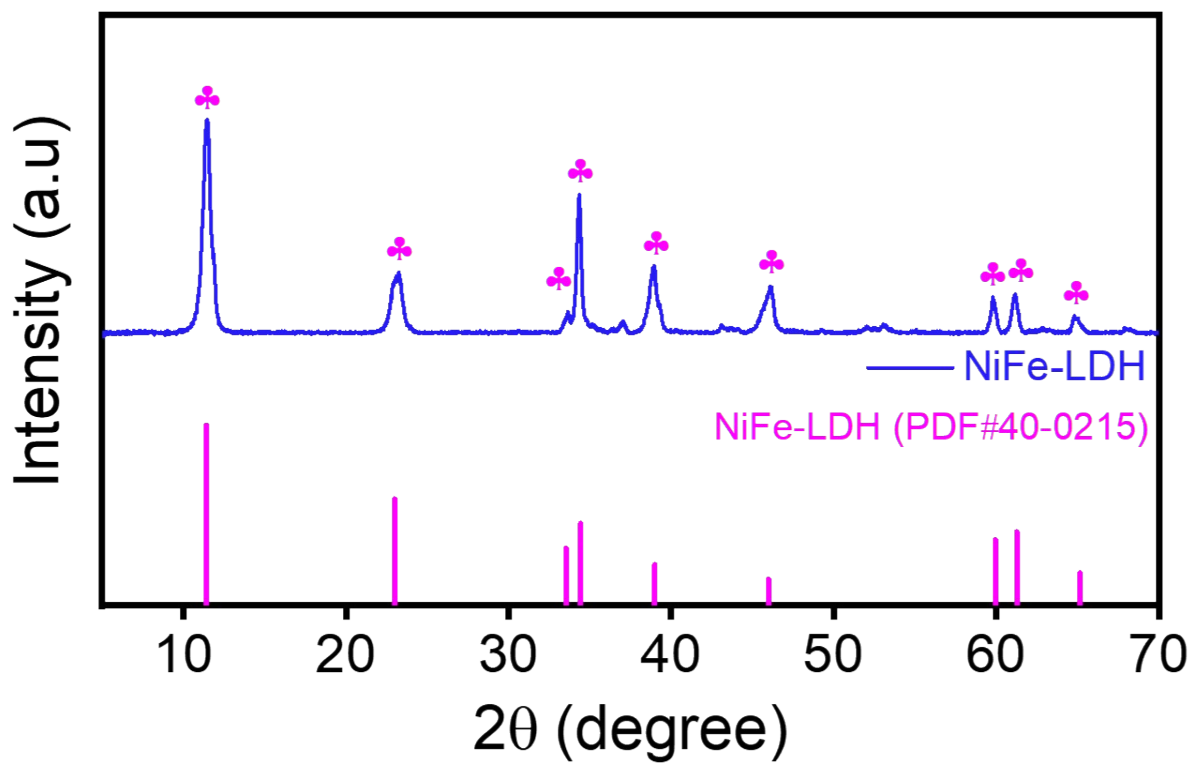

Fig. S5: PXRD analysis of NiFe-LDH.

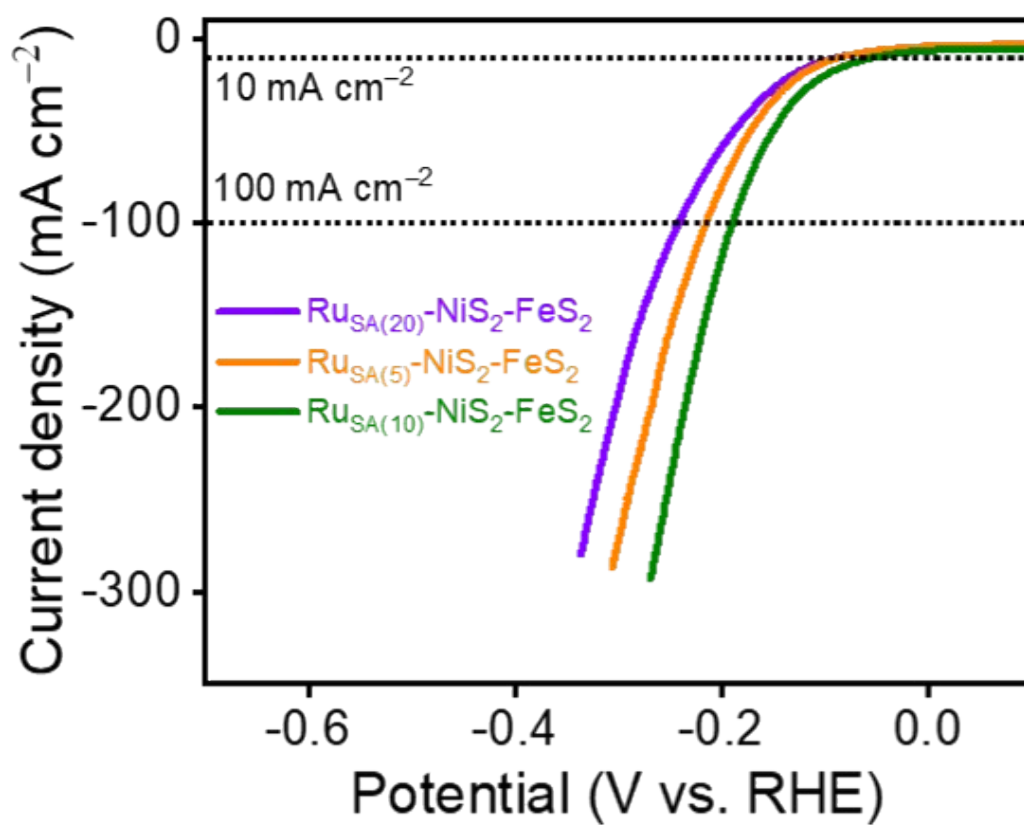

**Fig. S6:** LSV curves of electrocatalytic materials towards HER performance at varying contents of Ru.

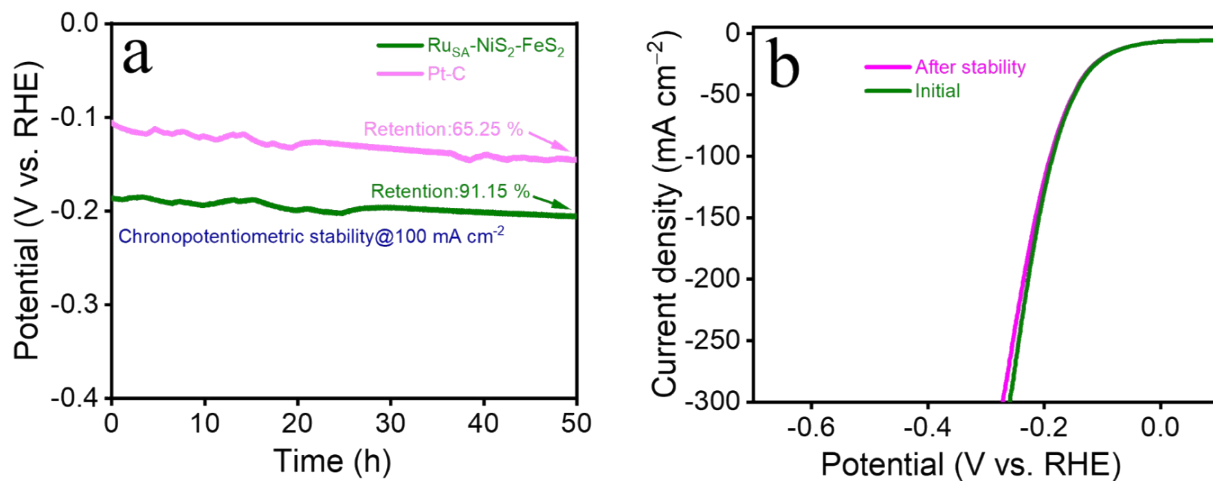

**Fig. S7:** (a) Long-term stability analysis of Ru<sub>SA</sub>-NiS<sub>2</sub>-FeS<sub>2</sub> and commercial Pt-C using chronopotentiometry (CP) technique. (b) LSV polarization curves of Ru<sub>SA</sub>-NiS<sub>2</sub>-FeS<sub>2</sub> before and after long term HER stability test.



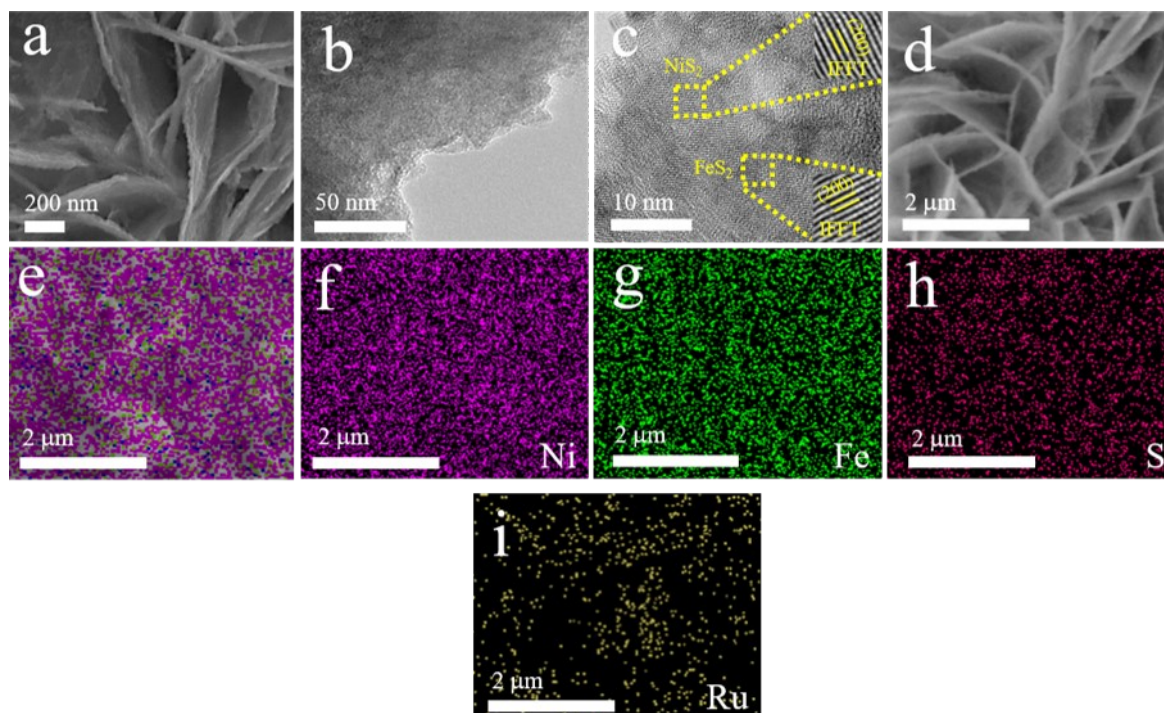

**Fig. S8:** After HER stability: **(a)** FE-SEM image, **(b)** TEM image, **(c)** HR-TEM image, **(d)** Electronic image of  $\text{Ru}_{\text{SA}}\text{-NiS}_2\text{-FeS}_2$ , **(e)** EDS layered image of  $\text{Ru}_{\text{SA}}\text{-NiS}_2\text{-FeS}_2$  **(f-h)** Elemental color mappings of Ni, Fe, S, and Ru of  $\text{Ru}_{\text{SA}}\text{-NiS}_2\text{-FeS}_2$ .

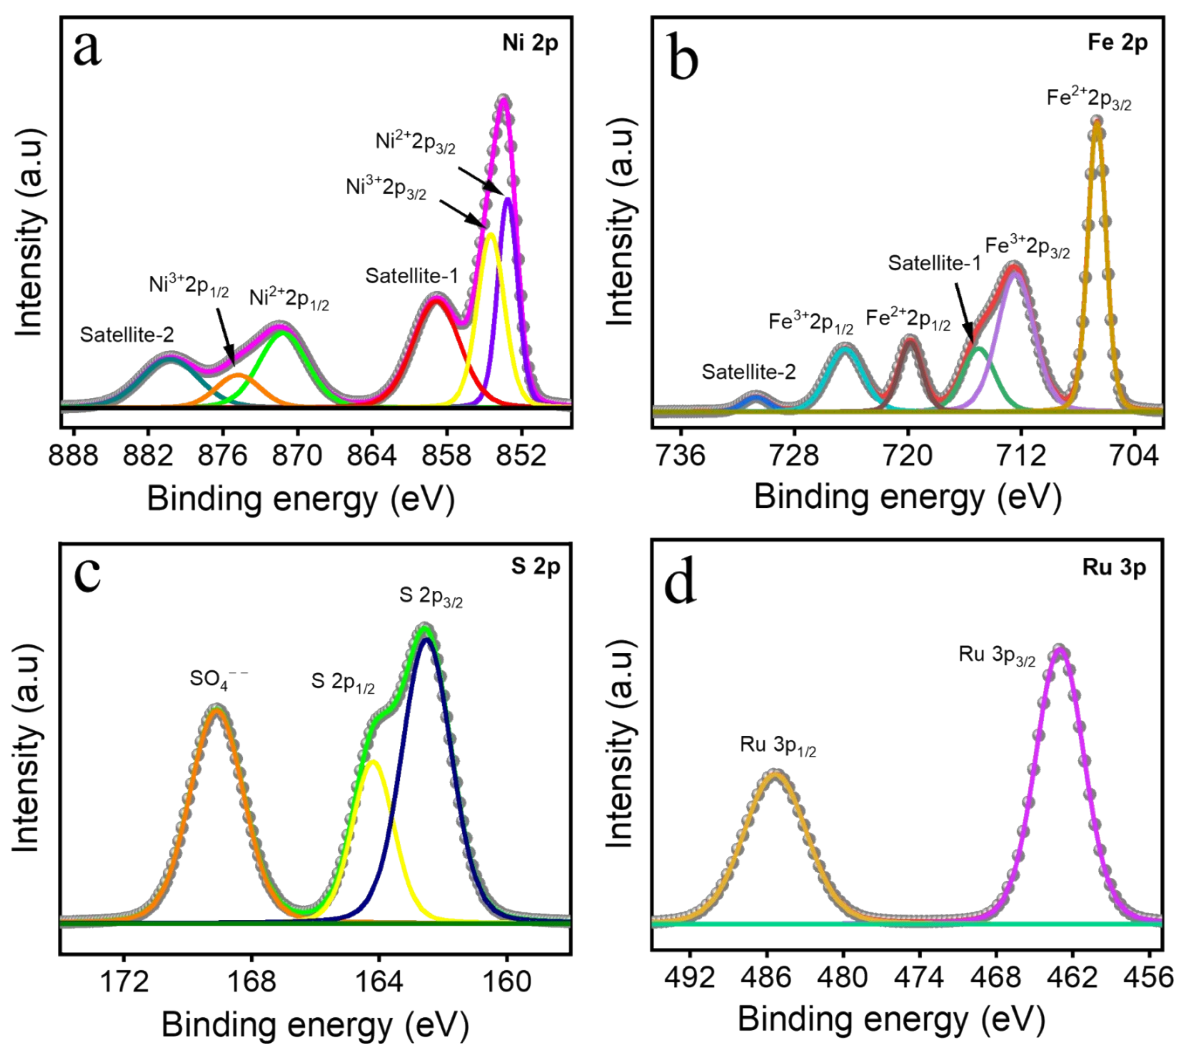

**Fig. S9:** (a) High-resolution XPS (HR-XPS) spectra of (a) Ni 2p, (b) Fe 2p, (c) S 2p, and (d) Ru 3p, of Ru<sub>SA</sub>-NiS<sub>2</sub>-FeS<sub>2</sub> after HER stability.

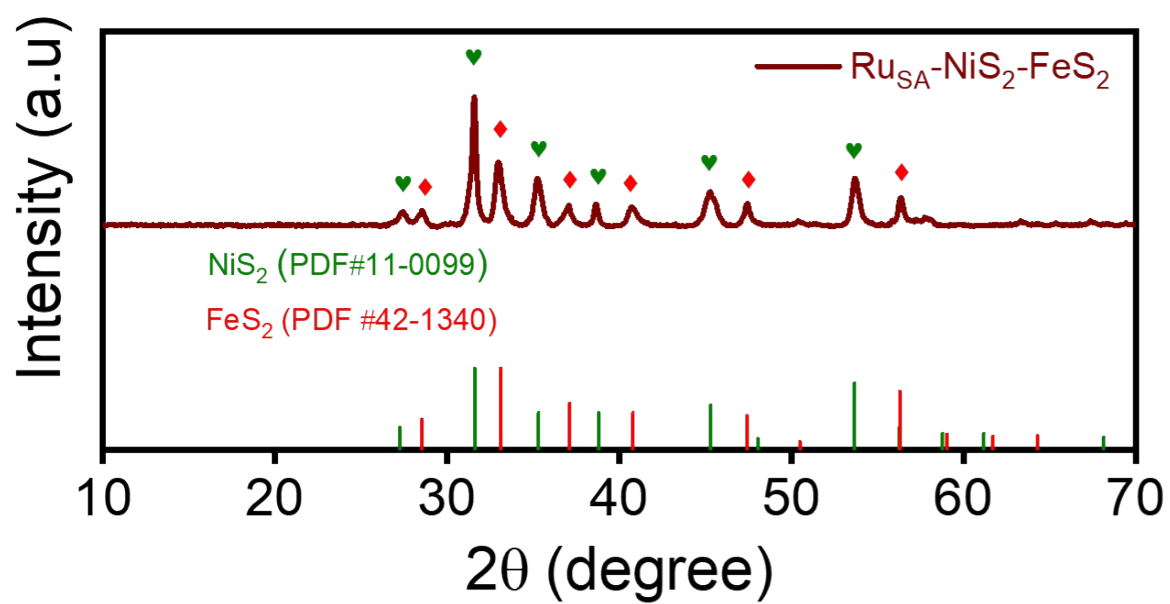

**Fig. S10:** PXRD patterns of  $\text{Ru}_{\text{SA}}\text{-NiS}_2\text{-FeS}_2$  after HER stability test.

**Table S1:** Comparative HER catalytic activity of Ru<sub>SA</sub>-NiS<sub>2</sub>-FeS<sub>2</sub> with the recently reported electrocatalysts.

| Electrocatalysts                                              | Overpotential (mV) @10 mA cm <sup>-2</sup> | References       |
|---------------------------------------------------------------|--------------------------------------------|------------------|
| <b>Ru<sub>SA</sub>-NiS<sub>2</sub>-FeS<sub>2</sub></b>        | <b>57</b>                                  | <b>This work</b> |
| NiS <sub>2</sub> /VS-3:1                                      | 74                                         | 1                |
| NiFe-LDH/MoS <sub>2</sub> -Ni <sub>3</sub> S <sub>2</sub> /NF | 79                                         | 2                |
| MnS <sub>x</sub> Se <sub>1-x</sub> @N,F-CQDs                  | 87                                         | 3                |
| NiFeCoS <sub>x</sub> @FeNi <sub>3</sub>                       | 88                                         | 4                |
| FeS <sub>2</sub> -MoS <sub>2</sub> @CoS <sub>2</sub> -MOF     | 92                                         | 5                |
| Mn-NiS <sub>x</sub> /NiO/Ni <sub>3</sub> N@NF                 | 93                                         | 6                |
| CoNi-SP/NPC                                                   | 105                                        | 7                |
| SnO <sub>2</sub> @MoS <sub>2</sub> /NF                        | 127                                        | 8                |
| Ni <sub>2</sub> FeS@NSC                                       | 271                                        | 9                |
| CNTs@Ir-CoNi <sub>2</sub> S <sub>4</sub>                      | 271.3                                      | 10               |

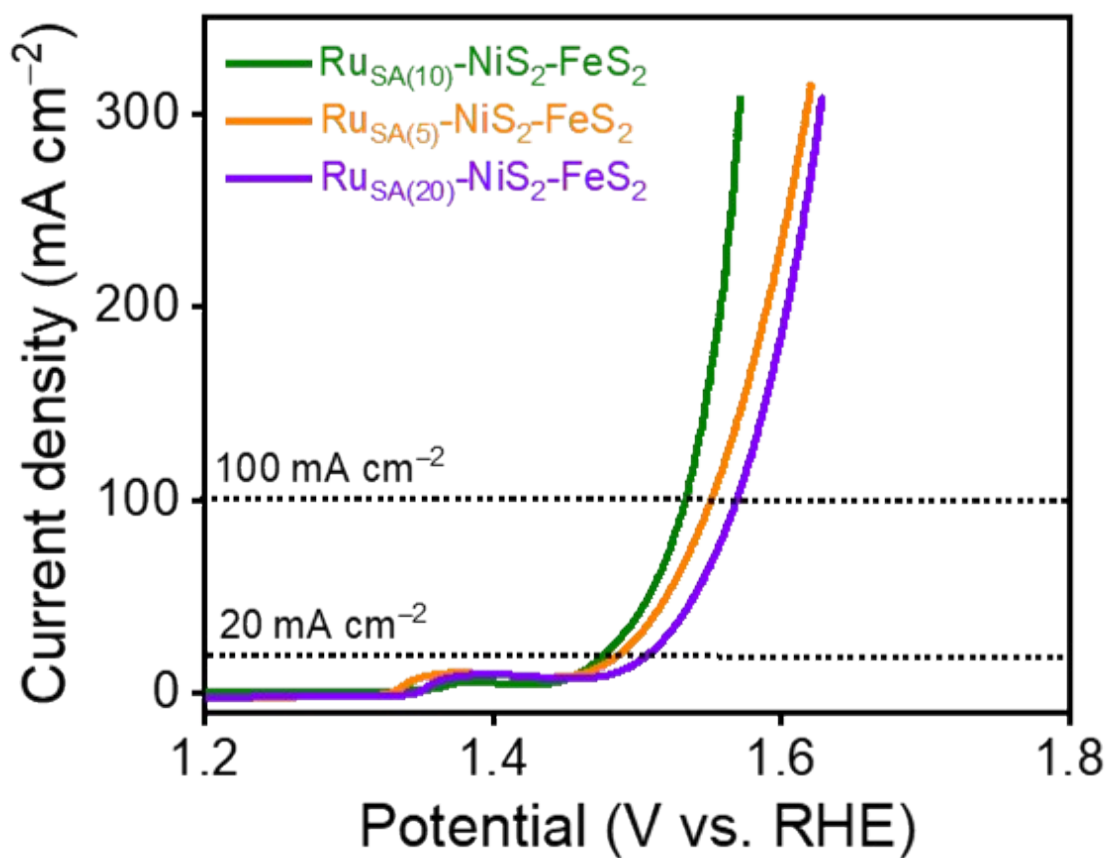

**Fig. S11:** LSV curves of electrocatalytic materials towards OER performance at varying contents of Ru.

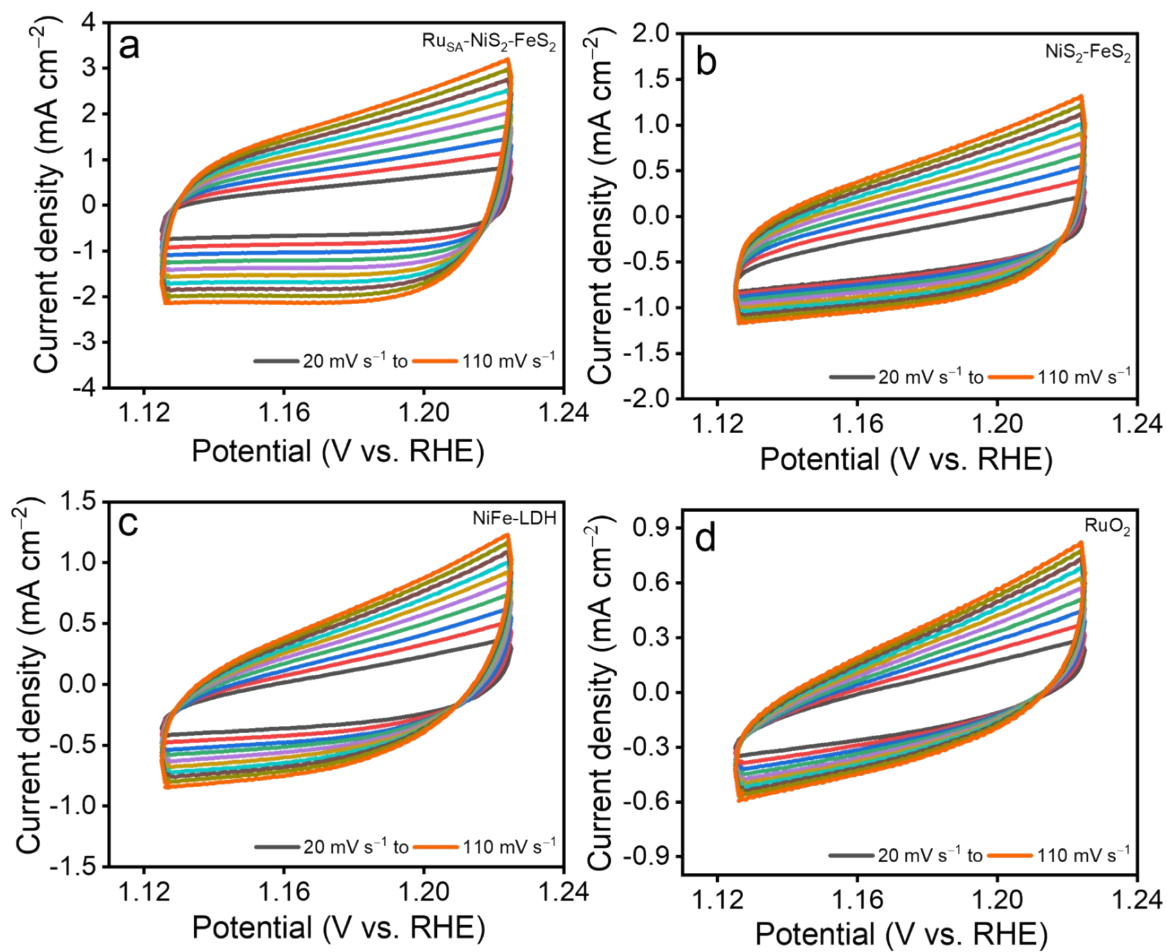

**Fig. S12:** Cyclic voltammograms (CV) of different electrocatalytic materials with scan rates ranging from 20 to 110 mV s<sup>-1</sup>.

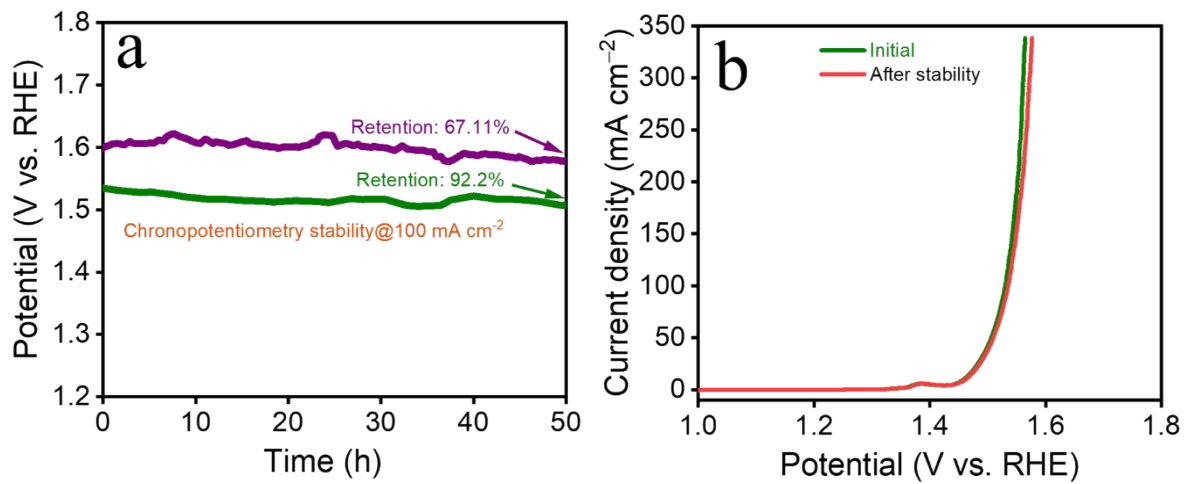

**Fig. S13:** (a) Long-term stability analysis of Ru<sub>SA</sub>-NiS<sub>2</sub>-FeS<sub>2</sub> and commercial RuO<sub>2</sub> using chronopotentiometry (CP) technique. (b) LSV polarization curves of Ru<sub>SA</sub>-NiS<sub>2</sub>-FeS<sub>2</sub> before and after long term OER stability test.

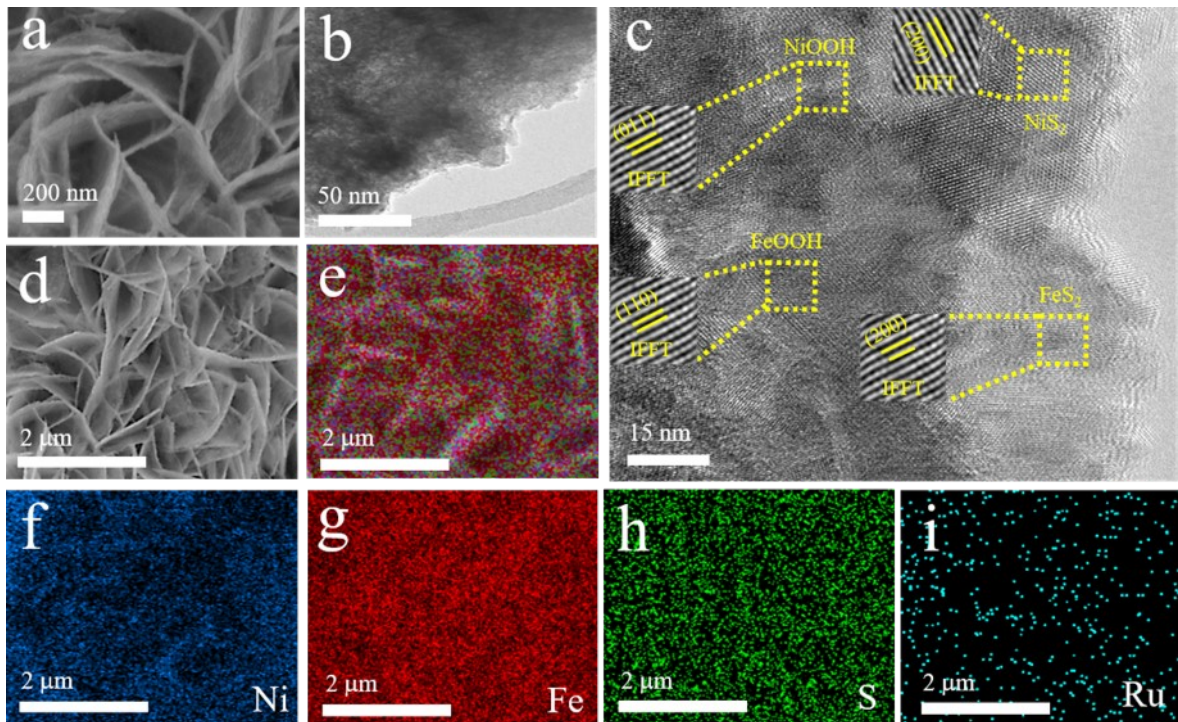

**Fig. S14:** After OER stability: (a) FE-SEM image, (b) TEM image, (c) HR-TEM image of  $\text{Ru}_{\text{SA}}\text{-NiS}_2\text{-FeS}_2$  with formation of metal oxyhydroxides, (d) Electronic image of  $\text{Ru}_{\text{SA}}\text{-NiS}_2\text{-FeS}_2$ , (e) EDS layered image of  $\text{Ru}_{\text{SA}}\text{-NiS}_2\text{-FeS}_2$  (f-i) Elemental color mappings of Ni, Fe, S, and Ru of  $\text{Ru}_{\text{SA}}\text{-NiS}_2\text{-FeS}_2$ .



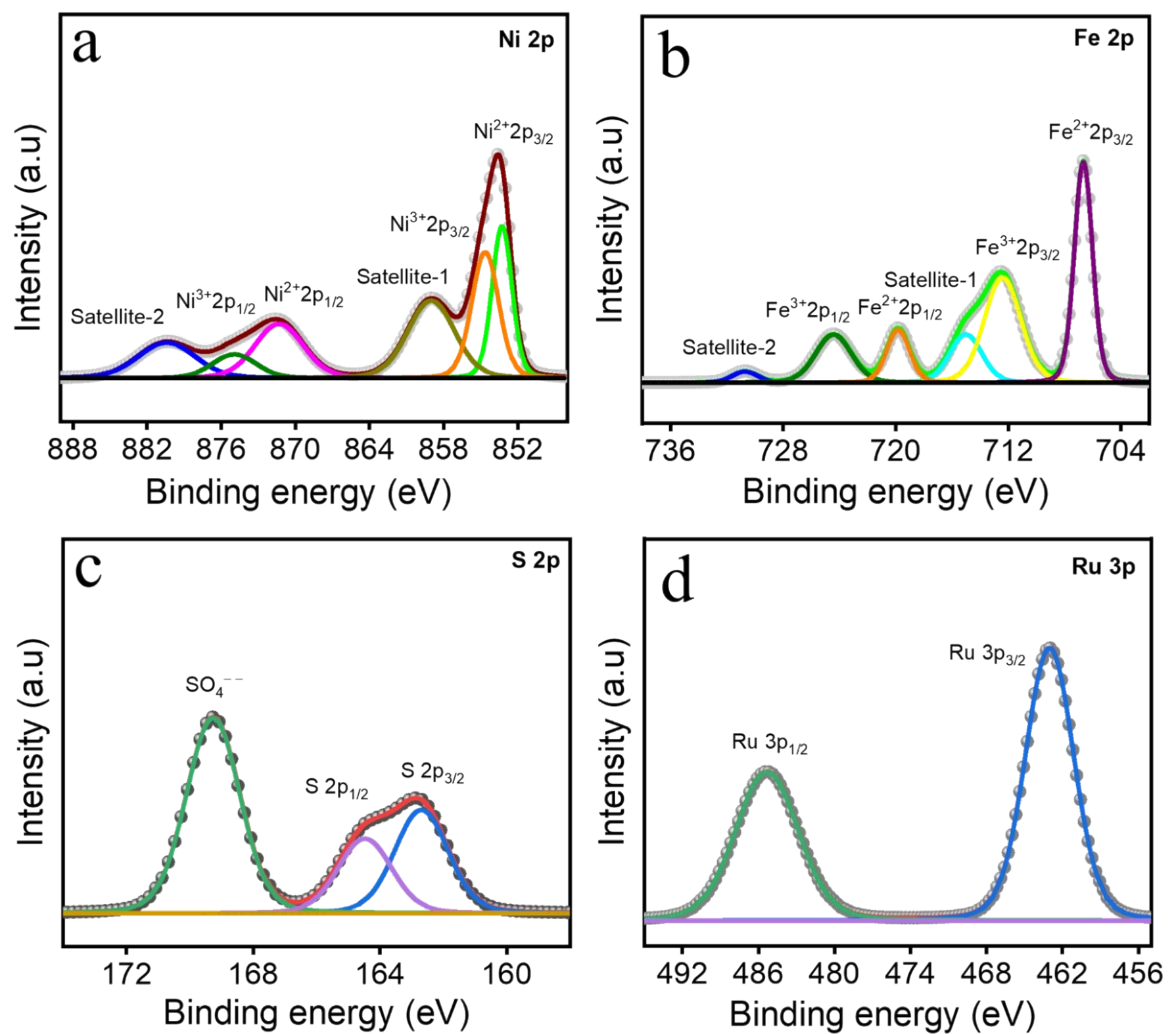

**Fig. S15 :** (a) High-resolution XPS (HR-XPS) spectra of (a) Ni 2p, (b) Fe 2p, (c) S 2p, and (d) Ru 3p, of Ru<sub>S</sub>A-NiS<sub>2</sub>-FeS<sub>2</sub> after OER stability.

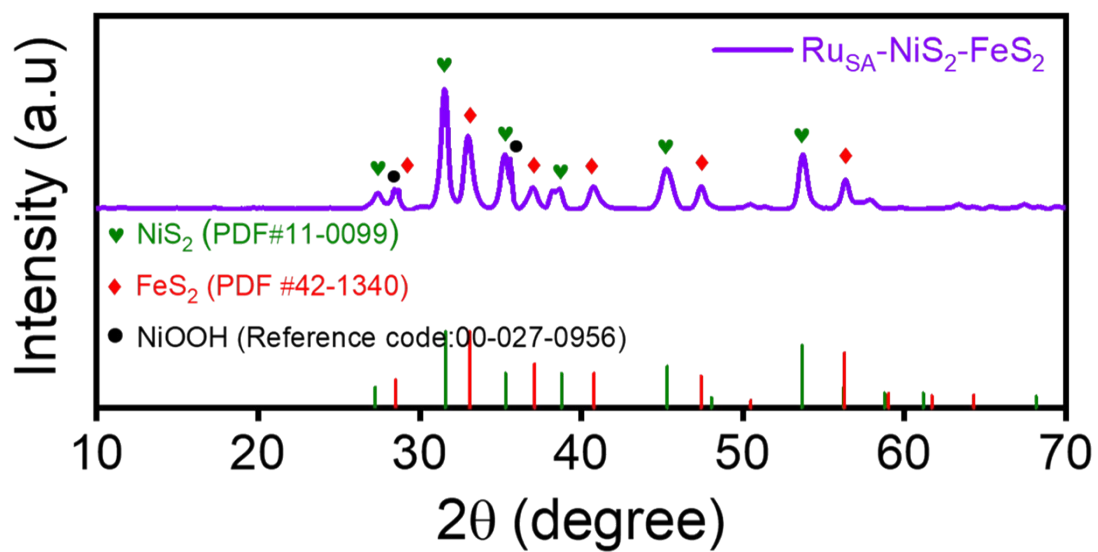

**Fig. S16:** PXRD patterns of  $\text{Ru}_{\text{SA}}\text{-NiS}_2\text{-FeS}_2$  after OER stability test.

## Density functional Theory (DFT) calculation

To explore the crystal structure of the ruthenium single atoms incorporated NiS<sub>2</sub>-FeS<sub>2</sub> heterostructures, we employed the Vienna Ab initio Simulation Package (VASP) based on the Density Functional Theory (DFT) method, in different applications including hydrogen evolution reaction (HER) and oxygen evolution reaction (OER). Initially, the materials were optimized to get stable structures.<sup>11</sup> The Perdew–Burke–Ernzerhof (PBE) exchange-correlation functional in the form of Generalized Gradient Approximation (GGA) was applied in this theoretical investigation.<sup>12</sup> To mitigate interactions between adjacent layers, 15 Å vacuum slabs were implemented. A plane wave basis set with an energy cut-off of 420 eV was used, and the projector augmented wave (PAW) method described electron-ion interactions. Grimme's DFT-D3 functional, based on a semi-empirical GGA-type theory, was employed to correct dispersion forces.<sup>13</sup> Structural relaxation continued until the Hellman-Feynman forces were below 0.02 eV/Å.

The cubic unit cell of NiS<sub>2</sub> (PDF # 11-0099) in the space group Pa-3(205) was optimized using a Brillouin zone sampling of 8 x 8 x 8 Monkhorst-Pack K-Points, with lattice constants a=b=c= 5.670 Å and angles  $\alpha=\beta=\gamma=90^\circ$ . Correspondingly, the cubic unit cell of FeS<sub>2</sub> (PDF# 42-1340) in the space group Pa-3(205) was optimized under the same conditions. Afterward, a surface was constructed using the unit cells of NiS<sub>2</sub> and FeS<sub>2</sub> in the (200) plane, with a 15 Å vacuum applied in the z-direction.

NiS<sub>2</sub> and FeS<sub>2</sub> were then combined into a heterostructure, and Ru single atoms were doped according to experimental data. Following the formation of the Ru<sub>SA</sub>-NiS<sub>2</sub>-FeS<sub>2</sub> heterostructure, optimization was carried out with 5 x 5 x 1 K-points. During the structure optimization, half layers of Ru<sub>SA</sub>-NiS<sub>2</sub>-FeS<sub>2</sub> were fixed, and the remaining half layers were relaxed.

### **H-adsorption energy ( $\Delta H^*$ ) and Gibbs free energy change ( $\Delta G_{H^*}$ ) in HER:**

The hydrogen adsorption energy ( $\Delta H^*$ ) is a critical parameter for assessing the material's HER capability. And, the calculation is based on the formula.<sup>14</sup>

$$\Delta H^* = E_{H^*/slab} - E_{slab} - (E_{H_2})/2 \quad (1)$$

Where,  $E_{H^*/slab}$ ,  $E_{slab}$ , and  $(E_{H_2})/2$  represent the energy of the material after  $H^*$  adsorption on the surface, the VASP energy or clean surface energy, and the energy of the isolated hydrogen molecule, respectively. Materials with energetically less favourable conditions exhibit higher catalytic stability and contains more stable hydrogen adsorption sites.<sup>15</sup>

The Gibbs free energy change for  $H^*$  adsorption was calculated using the formula proposed by Norskov et al.<sup>16</sup>

$$\Delta G_{H^*} = E_{H^*} - E_{surf} - (E_{H_2})/2 + \Delta E_{ZPE} - T\Delta S$$

(2)where  $E_{H^*}$ ,  $E_{surf}$ ,  $E_{H_2}$ ,  $\Delta E_{ZPE}$ , and  $\Delta S$  represent the total energies of the slab with the H-adsorbed surface, the

### **Gibbs free energy changes in OER:**

In our research, we have also computed the four steps of the OER in alkaline conditions on various active sites. The electron mechanism for the four steps in OER is outlined below.<sup>16</sup>

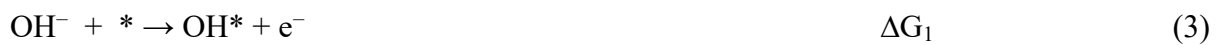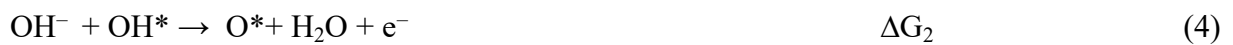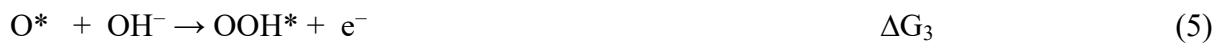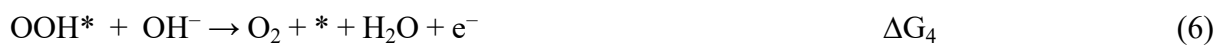

In these equations (3-6), OH, O, and OOH represent the adsorption sites of the oxygen evolution reaction on the surface of the electrocatalyst at various active sites. The Gibbs free

energy is calculated using these adsorption sites. Subsequently, we determined the theoretical overpotential ( $\eta$ ) of the catalyst material using the formula provided below.<sup>17</sup>

$$\eta_{OER} = \frac{\max\{\Delta G_1, \Delta G_2, \Delta G_3, \Delta G_4\}}{e} - 1.23 \text{ (V)} \quad (7)$$

The symbols  $\Delta G_1$ ,  $\Delta G_2$ ,  $\Delta G_3$ , and  $\Delta G_4$  represent the Gibbs free energies changes in OER steps.<sup>18</sup>

**Table S2:** Comparative OER catalytic activity of Ru<sub>SA</sub>-NiS<sub>2</sub>-FeS<sub>2</sub> with the recently reported

| Electrocatalysts                                                          | Overpotential<br>(mV@mA cm <sup>-2</sup> ) | References       |
|---------------------------------------------------------------------------|--------------------------------------------|------------------|
| <b>Ru<sub>SA</sub>-NiS<sub>2</sub>-FeS<sub>2</sub></b>                    | <b>242@20</b>                              | <b>This work</b> |
| NiS <sub>2</sub> /VS-3:1                                                  | 235@10                                     | 1                |
| VTe <sub>2</sub> @ZnFeTe/NF                                               | 240@20                                     | 19               |
| Fe MOF-Ni <sub>3</sub> S <sub>2</sub> /NF                                 | 243@100                                    | 20               |
| Fe-NiS <sub>2</sub> /NCNT                                                 | 247@100                                    | 21               |
| NiFe <sub>2</sub> O <sub>4</sub> @(Ni,Fe)S/P                              | 261@10                                     | 22               |
| CoV Ru LDH                                                                | 263@25                                     | 23               |
| MoP <sub>x</sub> S <sub>y</sub> @NiFeP <sub>x</sub> S <sub>y</sub> @NPS-C | 274@10                                     | 24               |
| NiCoS/NF                                                                  | 287@10                                     | 25               |
| SnO <sub>2</sub> @MoS <sub>2</sub> /NF                                    | 290@50                                     | 8                |
| CoNi-SP/NPC                                                               | 313@100                                    | 7                |

electrocatalysts.

**Table S3.**  $\Delta H^*$ -adsorption energy and Gibbs free energy change of  $\text{Ru}_{\text{SA}}\text{-NiS}_2\text{-FeS}_2$  at Ru, Ni, Fe, and S active-sites, respectively.

| Catalyst                                            | Adsorption sites | $\Delta H^*$ -Adsorption energy ( $E_{\text{ads}}$ , eV) | Gibbs Free Energy ( $\Delta G_{\text{H}^*}$ , eV) |
|-----------------------------------------------------|------------------|----------------------------------------------------------|---------------------------------------------------|
| * $\text{Ru}_{\text{SA}}\text{-NiS}_2\text{-FeS}_2$ | Ru               | -0.065                                                   | -0.101                                            |
| $\text{Ru}_{\text{SA}}\text{-*NiS}_2\text{-FeS}_2$  | Ni               | -0.108                                                   | -0.170                                            |
| $\text{Ru}_{\text{SA}}\text{-NiS}_2\text{-*FeS}_2$  | Fe               | -0.259                                                   | -0.182                                            |
| $\text{Ru}_{\text{SA}}\text{-NiS}_2\text{-Fe*S}_2$  | S                | -0.277                                                   | -0.195                                            |

**Table S4.** The theoretical Gibbs free energy change at different steps for  $\text{Ru}_{\text{SA}}\text{-NiS}_2\text{-FeS}_2$  during OER mechanism along with theoretical OER overpotential values at Ru, Ni, Fe, and S active-sites, respectively.

| Catalyst                                          | Adsorption sites | Gibbs free energy change $\Delta G_{\text{T}}$ (eV) |             |             |             | OER Overpotential ( $\eta$ , V) |
|---------------------------------------------------|------------------|-----------------------------------------------------|-------------|-------------|-------------|---------------------------------|
|                                                   |                  | $\Delta G1$                                         | $\Delta G2$ | $\Delta G3$ | $\Delta G4$ |                                 |
| $\text{Ru}_{\text{SA}}\text{-NiS}_2\text{-FeS}_2$ | Ru               | 0.701                                               | 0.846       | 1.659       | 1.715       | 0.48                            |
|                                                   | Ni               | 1.499                                               | 0.115       | 1.658       | 1.649       | 0.43                            |
|                                                   | Fe               | 0.753                                               | -0.019      | 2.112       | 2.074       | 0.88                            |
|                                                   | S                | 1.051                                               | 0.244       | 1.856       | 1.769       | 0.63                            |

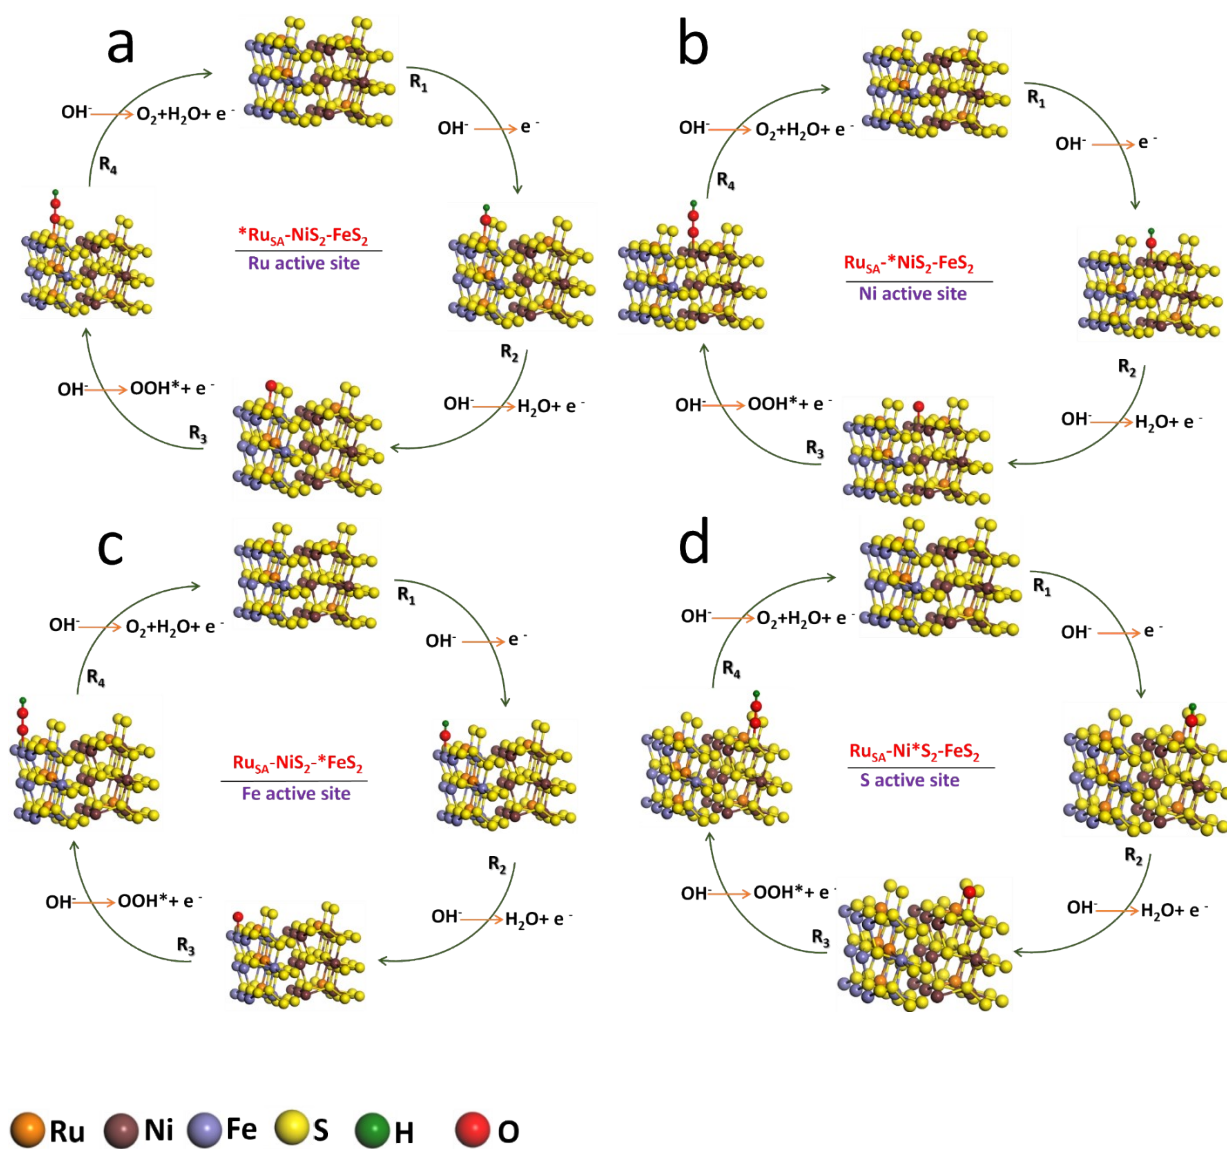

**Fig. S17.** The OER mechanism pathways for Ru<sub>SA</sub>-NiS<sub>2</sub>-FeS<sub>2</sub> at Ru, Ni, Fe, and S active-sites respectively.



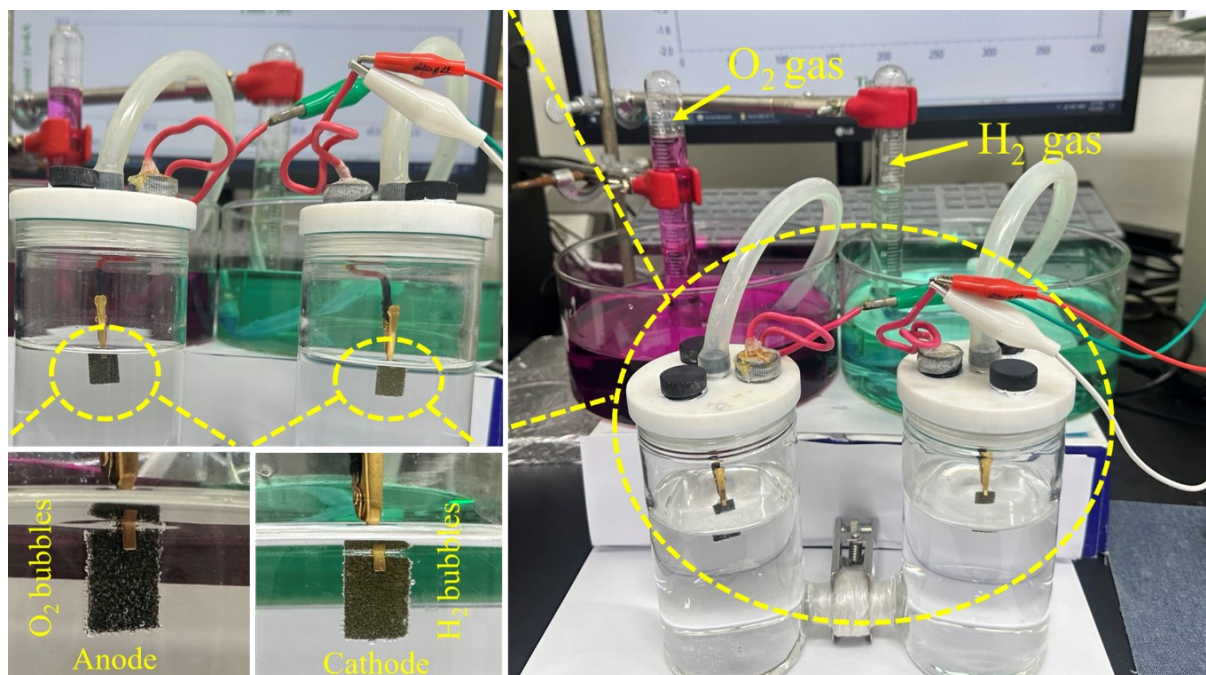

**Fig. S18:** Faradaic efficiency (FE) measurement using the laboratory-made two-electrode set up of alkaline electrolyzer assembled with Ru<sub>S<sub>A</sub></sub>-NiS<sub>2</sub>-FeS<sub>2</sub>, working as both anode and cathode during water splitting.

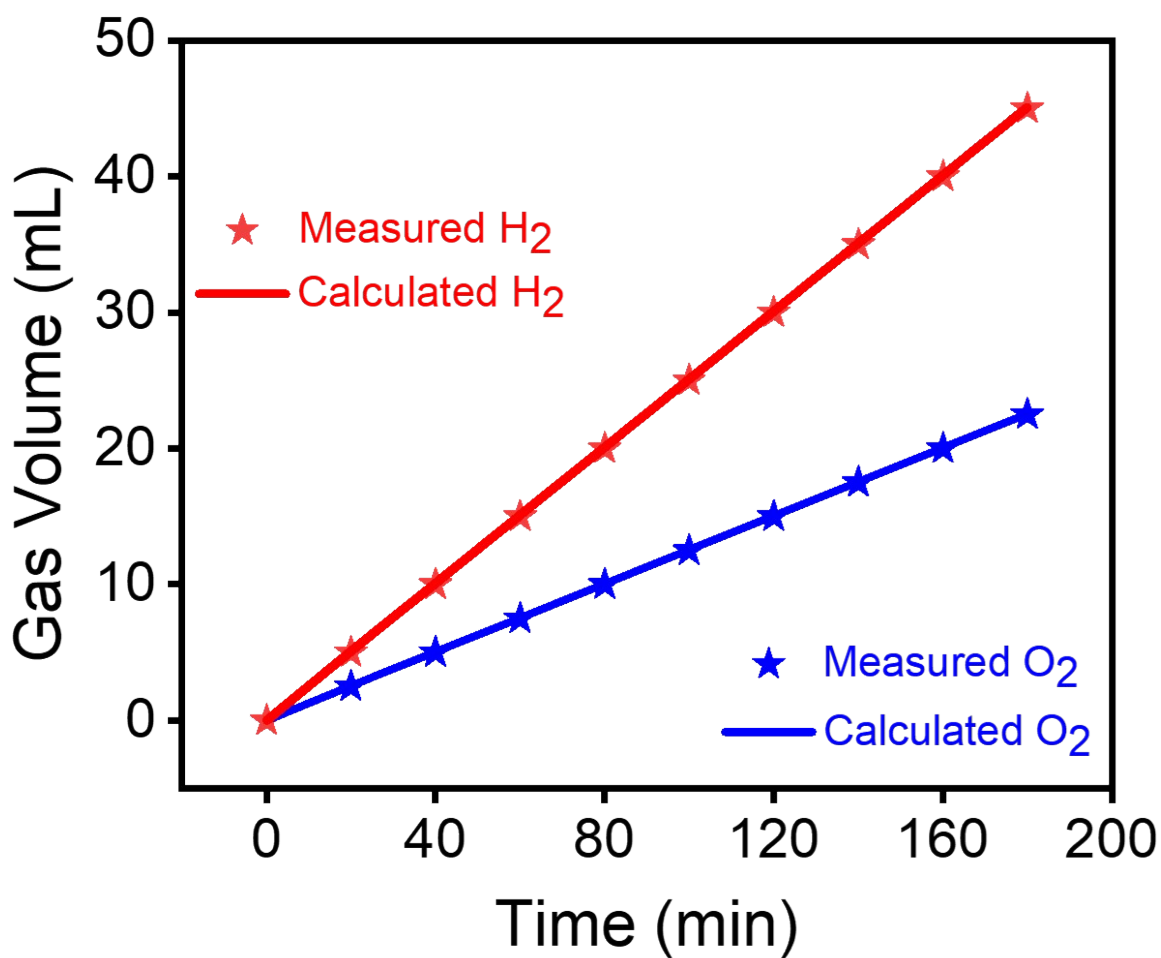

**Fig. S19:** Plot showing the calculated and experimental H<sub>2</sub> and O<sub>2</sub> volume ratio during Faradaic efficiency (FE) measurement.

**Table S5:** Comparative cell voltage of Ru<sub>SA</sub>-NiS<sub>2</sub>-FeS<sub>2</sub> device with the recently reported

| Bifunctional electrocatalysts                                 | Cell voltage<br>(V@10 mA cm <sup>-2</sup> ) | References       |
|---------------------------------------------------------------|---------------------------------------------|------------------|
| <b>Ru<sub>SA</sub>-NiS<sub>2</sub>-FeS<sub>2</sub></b>        | <b>1.47</b>                                 | <b>This work</b> |
| NiFe-LDH/MoS <sub>2</sub> -Ni <sub>3</sub> S <sub>2</sub> /NF | 1.50                                        | 2                |
| FeS <sub>2</sub> -MoS <sub>2</sub> @CoS <sub>2</sub> -MOF     | 1.51                                        | 5                |
| CoV Ru LDH                                                    | 1.52                                        | 23               |
| MnS <sub>x</sub> Se <sub>1-x</sub> @N,F-CQDs                  | 1.55                                        | 3                |
| FeNi <sub>2</sub> S <sub>4</sub> /CoFe                        | 1.56                                        | 26               |
| SnO <sub>2</sub> @MoS <sub>2</sub> /NF                        | 1.57                                        | 8                |
| VTe <sub>2</sub> @ZnFeTe/NF                                   | 1.58                                        | 19               |
| CNTs@Ir-CoNi <sub>2</sub> S <sub>4</sub> NSs                  | 1.60                                        | 10               |
| NSQDs@NiFe-TPA                                                | 1.66                                        | 27               |
| NiFeS@NSCs                                                    | 1.77                                        | 9                |

bifunctional electrocatalysts.



## References

- 1 K. Wu, H. Li, C. Lyu, J. Cheng, Y. Yang, X. Zhu, W. M. Lau and J. Zheng, *J. Alloys Compd.*, 2023, **945**, 169290.
- 2 S. Wang, X. Ning, Y. Cao, R. Chen, Z. Lu, J. Hu, J. Xie and A. Hao, *Inorg. Chem.*, 2023, **62**, 6428–6438.
- 3 B. Sun, G. Dong, J. Ye, D. feng Chai, X. Yang, S. Fu, M. Zhao, W. Zhang and J. Li, *Chem. Eng. J.*, 2023, **459**, 141610.
- 4 J. Shen, Q. Li, W. Zhang, Z. Cai, L. Cui, X. Liu, J. Liu, J. Liu and X. Liu, *J. Mater. Chem. A*, 2022, **10**, 5442–5451.
- 5 K. Chhetri, A. Muthurasu, B. Dahal, T. Kim, T. Mukhiya, S.-H. Chae, T. H. Ko, Y. C. Choi and H. Y. Kim, *Mater. Today Nano*, 2022, **17**, 100146.
- 6 P. Yi, Y. Song, C. Li, R. Liu and J. Sun, *Appl. Surf. Sci.*, 2023, **619**, 156789.
- 7 S. Chen, W. Liang, X. Wang, Y. Zhao, S. Wang, Z. Li, S. Wang, L. Hou, Y. Jiang and F. Gao, *J. Alloys Compd.*, 2023, **931**, 167575.
- 8 W. He, L. Wang, H. Zhang, S. Gao, W. Yu, D. Yin and X. Dong, *J. Alloys Compd.*, 2023, **938**, 168678.
- 9 J. Chang, S. Zang, F. Song, W. Wang, D. Wu, F. Xu, K. Jiang and Z. Gao, *Appl. Catal. A Gen.*, 2022, **630**, 118459.
- 10 X. Zhu, D. C. Nguyen, S. Prabhakaran, D. H. Kim, N. H. Kim and J. H. Lee, *Mater. Today Nano*, 2023, **21**, 100296.
- 11 G. Kresse and J. Furthmüller, *Comput. Mater. Sci.*, 1996, **6**, 15–50.

- 12 D. Joubert, *Phys. Rev. B - Condens. Matter Mater. Phys.*, 1999, **59**, 1758–1775.
- 13 D. Bogdanovski, P. J. Pöllmann and J. M. Schneider, *Nanoscale*, 2022, **14**, 12866–12874.
- 14 J. Balamurugan, T. T. Nguyen, D. H. Kim, N. H. Kim and J. H. Lee, *Appl. Catal. B Environ.*, 2021, **286**, 119909.
- 15 J. K. Nørskov, T. Bligaard, A. Logadottir, J. R. Kitchin, J. G. Chen, S. Pandelov and U. Stimming, *J. Electrochem. Soc.*, 2005, **152**, J23.
- 16 J. K. Nørskov, J. Rossmeisl, A. Logadottir, L. Lindqvist, J. R. Kitchin, T. Bligaard and H. Jónsson, *J. Phys. Chem. B*, 2004, **108**, 17886–17892.
- 17 S. Prabhakaran and D. H. Kim, *Appl. Surf. Sci.*, 2023, **614**, 156255.
- 18 S. Ramakrishnan, D. B. Velusamy, S. Sengodan, G. Nagaraju, D. H. Kim, A. R. Kim and D. J. Yoo, *Appl. Catal. B Environ.*, 2022, **300**, 120752.
- 19 J. Gautam, D. Chanda, M. M. Meshesha, S. G. Jang and B. L. Yang, *Chem. Eng. J.*, 2023, **467**, 143535.
- 20 X.-Y. Wang, M. Zhu, Q.-N. Bian, B.-S. Guo, W.-Q. Kong, C.-B. Wang and Y.-Y. Feng, *ACS Appl. Nano Mater.*, , DOI:10.1021/acsanm.2c05104.
- 21 X. Liu, X. Zhao, S. Cao, M. Xu, Y. Wang, W. Xue and J. Li, *Appl. Catal. B Environ.*, 2023, **331**, 122715.
- 22 Y. L. Wang, T. H. Yang, S. Yue, H. B. Zheng, X. P. Liu, P. Z. Gao, H. Qin and H. N. Xiao, *ACS Appl. Mater. Interfaces*, 2023, **15**, 11631–11641.
- 23 K. Zeng, M. Tian, X. Chen, J. Zhang, M. H. Rummeli, P. Strasser, J. Sun and R. Yang, *Chem. Eng. J.*, 2023, **452**, 139151.

- 24 X. Zeng, H. Zhang, R. Yu, G. D. Stucky and J. Qiu, , DOI:10.1039/d3ta01993d.
- 25 Y. Zhang, L. Lin, J. Liu, J. Peng, Z. Chen and L. Chen, *Int. J. Hydrogen Energy*, 2021, **46**, 36629–36639.
- 26 V. Maheskumar, K. Saravanakumar, Y. Yea, Y. Yoon and C. M. Park, *Int. J. Hydrogen Energy*, 2023, **48**, 5080–5094.
- 27 J. Lin, H. Zhou, R. S. Amin, A. E. Fetohi, K. M. El-Khatib, C. Wang, L. Guo and Y. Wang, *Inorg. Chem. Front.*, 2023, **10**, 1294–1304.
